# Supplementary material for: Rapid Quantification of SARS-Cov-2 Spike Protein Enhanced with a Machine Learning Technique Integrated in a Smart and Portable Immunosensor
Source: MDPI journal article supplement (doi:10.3390/bios12060426), 2022-06-17
Supplement: s1 [file s1]

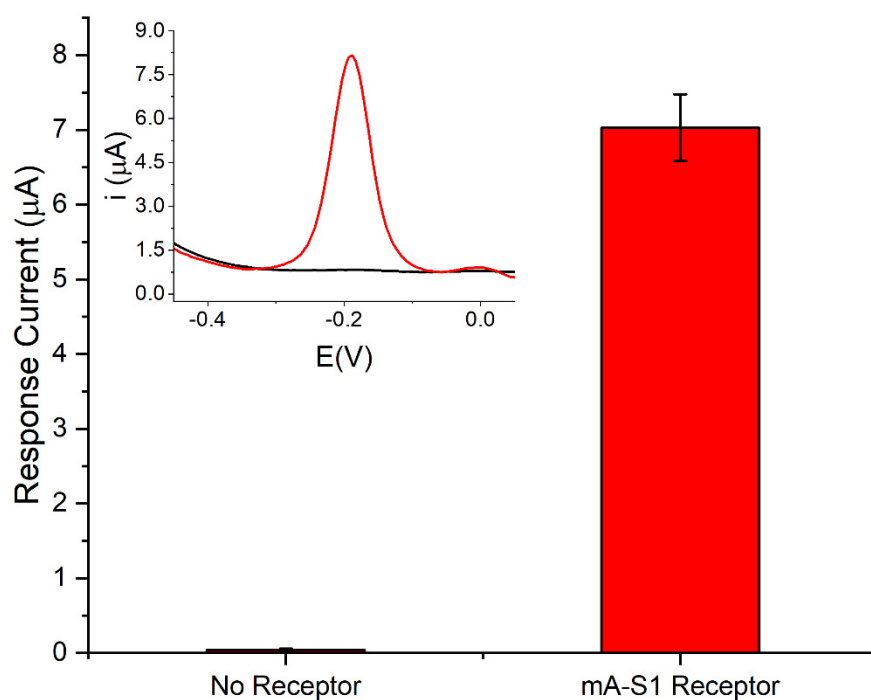

**Figure S1.** Signals recorded incubating incubating a 15  $\mu\text{g/mL}$  solution of SARS-CoV-2 S1 containing also pA-S1 and GAR-AP at 10 and 2  $\mu\text{g/mL}$ , respectively, on GNP-SPEs functionalized (right) and not functionalized (left) with mA-S1 receptor. Inset: DPV voltammograms recorded in the presence (red) and in the absence (black) of mA-S1 receptor on GNP-SPEs.
